# Supplementary material for: Clinical and Molecular Heterogeneity in Patients with Innate Resistance to Anti-PD-1 +/− Anti-CTLA-4 Immunotherapy in Metastatic Melanoma Reveals Distinct Therapeutic Targets
Source: MDPI journal article supplement (doi:10.3390/cancers13133186), 2021-06-25
Supplement: s1 [file s1]

**Supplementary Table S3. Comparison of baseline clinical factors in rapid progressors (PFS < 2 months) versus other progressors (PFS ≥ 2 months).**

| <b>Factor</b>                          | <b>PFS &lt; 2 months<br/>(n=22)</b> | <b>PFS ≥ 2 months<br/>(n=18)</b> | <b><i>P value</i></b> |
|----------------------------------------|-------------------------------------|----------------------------------|-----------------------|
| <b>Age in years (median)</b>           | 69 (34 – 96)                        | 65 (49 – 91)                     | 0.7984                |
| <b>Sex, male</b>                       | 16/22 (73%)                         | 10/18 (56%)                      | 0.3267                |
| <b>ECOG PS, ≥1</b>                     | 12/22 (55%)                         | 7/18 (39%)                       | 0.3596                |
| <b>Elevated LDH<sup>1</sup></b>        | 11/22 (50%)                         | 4/17 (24%)                       | 0.1116                |
| <b>Tumour burden</b>                   | <b>128 (19-366)</b>                 | <b>47 (15-200)</b>               | <b>0.0625</b>         |
| <b>Number of mets</b>                  | 6.5 (2-17)                          | 5 (1-12)                         | 0.2913                |
| <b>Number of organ sites with mets</b> | 3 (1-7)                             | 2 (1-4)                          | 0.1655                |
| <b>Brain mets</b>                      | 9/22 (41%)                          | 3/18 (17%)                       | 0.1654                |
| <b>Liver mets</b>                      | 8/22 (36%)                          | 3/18 (17%)                       | 0.2863                |
| <b>Staging, M1C/M1D</b>                | 16/22 (73%)                         | 8/18 (44%)                       | 0.1064                |
| <b>BRAF V600E mutation<sup>2</sup></b> | 5/8 (63%)                           | 0/1 (0%)                         | 0.4444                |

ECOG PS - Eastern Clinical Oncology Group (ECOG) performance status; LDH – lactate dehydrogenase; Tumor burden - sum of diameters of large metastases according to RECIST criteria; mets – metastases; n – number; % - percentage.

<sup>1</sup> missing values: 1

<sup>2</sup> as a proportion of total BRAF mutations

**Supplementary Table S4. Subsequent therapies received by patients who progressed on anti-PD-1-based therapies.**

| <b>Subsequent Therapy</b>     | <b>Progressed on anti-PD-1<br/>(n=13)</b> | <b>Progressed on ipilimumab<br/>+ anti-PD-1 (n=9)</b> |
|-------------------------------|-------------------------------------------|-------------------------------------------------------|
| <b>Ipilimumab + anti-PD-1</b> | 9/13 (69%)                                | 0/9 (0%)                                              |
| <b>Ipilimumab monotherapy</b> | 3/13 (23%)                                | 0/9 (0%)                                              |
| <b>Chemotherapy</b>           | 1/13 (8%)                                 | 2/9 (22%)                                             |
| <b>Targeted therapy</b>       | 0/13 (0%)                                 | 7/9 (78%)                                             |

**Supplementary Table S5. Comparison of baseline clinical factors in patients who are still alive versus those who have died at the data cut.**

| <b>Factor</b>                          | <b>Alive (n=14)</b> | <b>Dead (n=26)</b> | <b><i>P value</i></b> |
|----------------------------------------|---------------------|--------------------|-----------------------|
| <b>Age in years (median)</b>           | 77 (37 – 96)        | 65 (34 – 89)       | 0.1539                |
| <b>Sex, male</b>                       | 9/14 (65%)          | 17/26 (64%)        | >0.9999               |
| <b>ECOG PS, ≥1</b>                     | 7/14 (50%)          | 12/26 (46%)        | >0.9999               |
| <b>Elevated LDH<sup>1</sup></b>        | 4/13 (31%)          | 11/26 (42%)        | 0.7281                |
| <b>Tumour burden</b>                   | 44 (15-366)         | 121 (15-242)       | 0.2741                |
| <b>Number of mets</b>                  | 5 (2-17)            | 7 (1-12)           | 0.4633                |
| <b>Number of organ sites with mets</b> | 2 (1-7)             | 3 (1-5)            | 0.4273                |
| <b>Brain mets</b>                      | 5/14 (36%)          | 7/26 (27%)         | 0.7201                |
| <b>Liver mets</b>                      | <b>1/14 (7%)</b>    | <b>10/26 (38%)</b> | <b>0.0614</b>         |
| <b>Staging, M1C/M1D</b>                | 7/14 (75%)          | 17/26 (65%)        | 0.5001                |
| <b>BRAF V600E mutation<sup>2</sup></b> | 2/5 (40%)           | 3/4 (75%)          | 0.5238                |

ECOG PS - Eastern Clinical Oncology Group (ECOG) performance status; LDH – lactate dehydrogenase; Tumor burden - sum of diameters of large metastases according to RECIST criteria; mets – metastases; n – number; % - percentage.

<sup>1</sup> missing values: 1

<sup>2</sup> as a proportion of total BRAF mutations

**Supplementary Table S6. Comparison of baseline clinical factors in non-responders with low TILs versus intermediate/high TILs.**

| <b>Factor</b>                              | <b>Low TILs<br/>(n=14)</b> | <b>Intermediate/High<br/>TILs (n=23)</b> | <b><i>P value</i></b> |
|--------------------------------------------|----------------------------|------------------------------------------|-----------------------|
| <b>Age in years (median)</b>               | 72 (49 – 96)               | 67 (34 – 87)                             | 0.2192                |
| <b>Sex, male</b>                           | 10/14 (71%)                | 14/23 (61%)                              | 0.7245                |
| <b>ECOG PS, ≥1</b>                         | 7/14 (50%)                 | 10/23 (43%)                              | 0.7447                |
| <b>Elevated LDH<sup>1</sup></b>            | 5/14 (36%)                 | 9/22 (41%)                               | >0.9999               |
| <b>Tumour burden</b>                       | 102 (19-202)               | 118 (15-366)                             | 0.6111                |
| <b>Number of mets</b>                      | 7.5 (2-17)                 | 5.5 (2-17)                               | 0.8401                |
| <b>Number of organ<br/>sites with mets</b> | 2.5 (1-5)                  | 3 (1-7)                                  | 0.9033                |
| <b>Brain mets</b>                          | 2/14 (14%)                 | 8/23 (35%)                               | 0.2603                |
| <b>Liver mets</b>                          | 6/14 (43%)                 | 5/23 (22%)                               | 0.2679                |
| <b>Staging, M1C/M1D</b>                    | 7/14 (50%)                 | 15/23 (65%)                              | 0.4933                |
| <b>BRAF V600E<br/>mutation<sup>2</sup></b> | 1/3 (33%)                  | 4/5 (80%)                                | 0.4643                |

ECOG PS - Eastern Clinical Oncology Group (ECOG) performance status; LDH – lactate dehydrogenase;  
Tumor burden - sum of diameters of large metastases according to RECIST criteria; mets –  
metastases; n – number; % - percentage.

<sup>1</sup> missing values: 1

<sup>2</sup> as a proportion of total BRAF mutations

**Supplementary Table S7. KEGG pathway analysis of differentially expressed genes.**

| <b>NAME</b>                            | <b>SIZE</b> | <b>ES</b> | <b>NES</b> | <b>NOM p-val</b> | <b>FDR q-val</b> |
|----------------------------------------|-------------|-----------|------------|------------------|------------------|
| KEGG_HEMATOPOIETIC_CELL_LINEAGE        | 3           | -0.82609  | -1.50926   | 0.027896997      | 0.10045286       |
| KEGG_PRIMARY_IMMUNODEFICIENCY          | 2           | -0.83333  | -1.35503   | 0.104803495      | 0.17845923       |
| KEGG_T_CELL_RECEPTOR_SIGNALING_PATHWAY | 2           | -0.83333  | -1.33643   | 0.092337914      | 0.16044548       |

**Supplementary Table S8. Comparison of baseline clinical factors between non-responders in Cluster 1 and Cluster 2 based on unsupervised hierarchical clustering of 26 differentially expressed genes.**

| <b>Factor</b>                          | <b>RNA cluster 1<br/>(n=17)</b> | <b>RNA cluster 2<br/>(n=20)</b> | <b><i>P</i> value</b> |
|----------------------------------------|---------------------------------|---------------------------------|-----------------------|
| <b>Age in years (median)</b>           | 61 (33 – 86)                    | 70 (41 – 95)                    | 0.1174                |
| <b>Sex, male</b>                       | 12/17 (71%)                     | 12/20 (60%)                     | 0.7307                |
| <b>ECOG PS, ≥1</b>                     | 5/17 (29%)                      | 12/20 (60%)                     | 0.0994                |
| <b>Elevated LDH<sup>1</sup></b>        | 5/16 (31%)                      | 9/20 (45%)                      | 0.5007                |
| <b>Tumour burden<sup>2</sup></b>       | 118 (15 – 242)                  | 90.5 (15 – 366)                 | 0.5452                |
| <b>Number of mets<sup>2</sup></b>      | 5.5 (2 – 12)                    | 7 (1 – 17)                      | 0.7297                |
| <b>Number of organ sites with mets</b> | 3 (1-4)                         | 2 (1-7)                         | 0.5363                |
| <b>Brain mets</b>                      | 4/17 (24%)                      | 6/20 (30%)                      | 0.7246                |
| <b>Liver mets</b>                      | 5/17 (29%)                      | 6/20 (30%)                      | >0.9999               |
| <b>Staging, M1C/M1D</b>                | 11/17 (65%)                     | 11/20 (55%)                     | 0.7384                |
| <b>BRAF V600E mutation<sup>3</sup></b> | 2/3 (67%)                       | 3/5 (60%)                       | >0.9999               |
| <b>Received subsequent therapies</b>   | 10/17 (59%)                     | 11/20 (55%)                     | >0.9999               |

ECOG PS - Eastern Clinical Oncology Group (ECOG) performance status; LDH – lactate dehydrogenase; Tumor burden - sum of diameters of large metastases according to RECIST criteria; mets – metastases; n – number; % - percentage.

<sup>1</sup> missing values: 1

<sup>2</sup> missing values: RNA cluster 1 – 1; RNA cluster 2 – 4

<sup>3</sup> as a proportion of total BRAF mutations

**Supplementary Table S9. Comparison of baseline clinical factors between non-responders in Cluster A, Cluster B and Cluster C based on unsupervised hierarchical clustering of 36 genes, including druggable immune checkpoints.**

| Factor                              | RNA cluster A<br>(n=6) | RNA cluster B<br>(n=14) | RNA cluster C<br>(n=17) | <i>P value</i> |
|-------------------------------------|------------------------|-------------------------|-------------------------|----------------|
| Age in years (median)               | 68 (51 – 77)           | 63 (33 – 95)            | 68 (41 – 88)            | 0.8079         |
| Sex, male                           | 3/6 (50%)              | 9/14 (64%)              | 12/17 (71%)             | 0.7355         |
| ECOG PS, ≥1                         | 4/6 (67%)              | 4/14 (29%)              | 9/17 (53%)              | 0.2291         |
| Elevated LDH <sup>1</sup>           | 2/6 (33%)              | 2/13 (15%)              | 10/17 (59%)             | <b>0.0541</b>  |
| Tumour burden <sup>2</sup>          | 137 (15 – 166)         | 76 (15 – 242)           | 122 (19 – 366)          | 0.9026         |
| Number of mets <sup>2</sup>         | 8 (3 – 9)              | 5 (2 – 12)              | 6.5 (1 – 17)            | 0.6626         |
| Number of organ sites<br>with mets  | 2 (1-4)                | 3 (1-4)                 | 3 (1-7)                 | 0.4772         |
| Brain mets                          | 1/6 (17%)              | 3/14 (21%)              | 6/17 (35%)              | 0.6116         |
| Liver mets                          | 1/6 (17%)              | 3/14 (21%)              | 7/17 (41%)              | 0.3963         |
| Staging, M1C/M1D                    | 2/6 (33%)              | 8/14 (57%)              | 12/17 (71%)             | 0.27           |
| BRAF V600E<br>mutation <sup>3</sup> | 1/2 (50%)              | 1/2 (50%)               | 3/4 (75%)               | >0.9999        |
| Received subsequent<br>therapies    | 3/6 (50%)              | 7/14 (50%)              | 11/17 (65%)             | 0.6709         |

ECOG PS - Eastern Clinical Oncology Group (ECOG) performance status; LDH – lactate dehydrogenase;  
Tumor burden - sum of diameters of large metastases according to RECIST criteria; mets –  
metastases; n – number; % - percentage.

<sup>1</sup> missing values: 1

<sup>2</sup> missing values: RNA cluster A – 1; RNA cluster B – 1; RNA cluster C – 1

<sup>3</sup> as a proportion of total BRAF mutations
