# Supplementary material for: Clinical and Molecular Heterogeneity in Patients with Innate Resistance to Anti-PD-1 +/− Anti-CTLA-4 Immunotherapy in Metastatic Melanoma Reveals Distinct Therapeutic Targets
Source: MDPI journal article supplement (doi:10.3390/cancers13133186), 2021-06-25
Supplement: s1 [file s1]

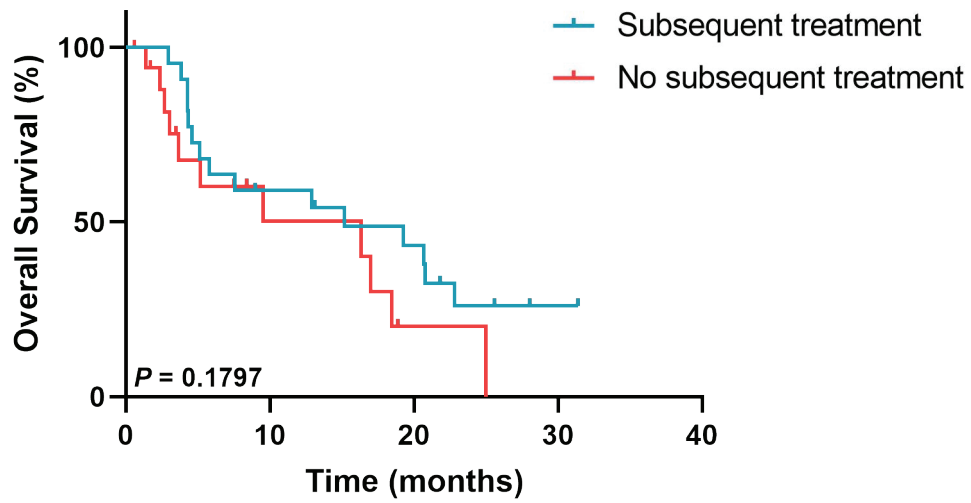

| Number at risk |    |    |   |   |   |
|----------------|----|----|---|---|---|
| —              | 22 | 12 | 8 | 1 | 0 |
| —              | 18 | 5  | 1 | 0 | 0 |

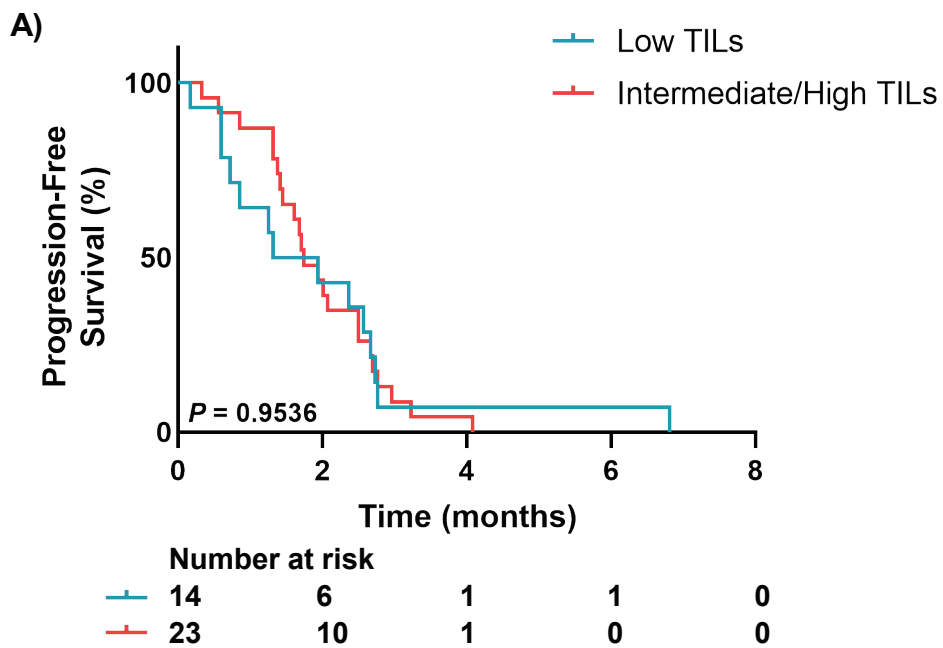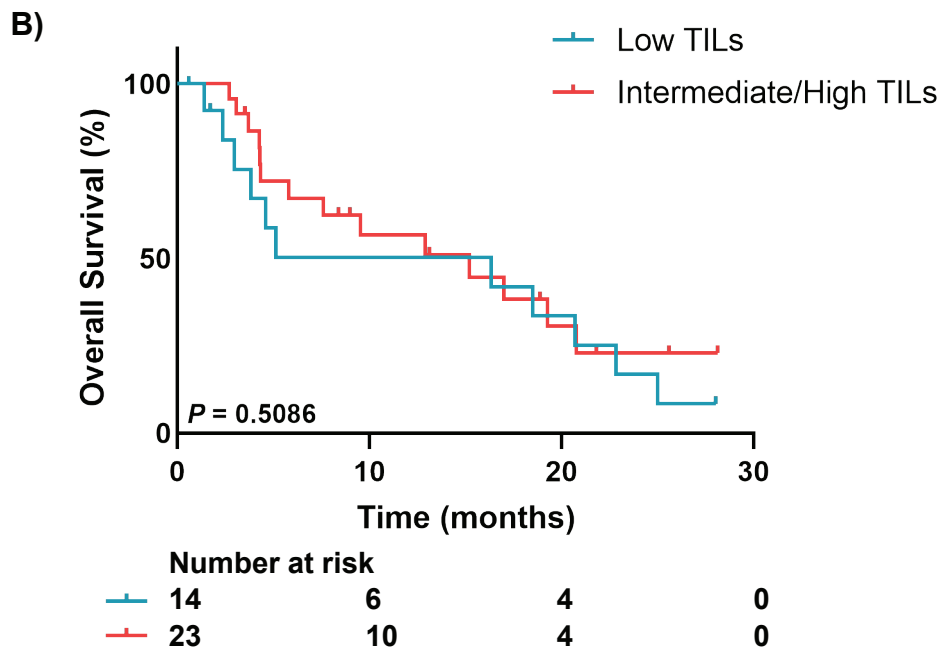

### Supplementary Figure 3

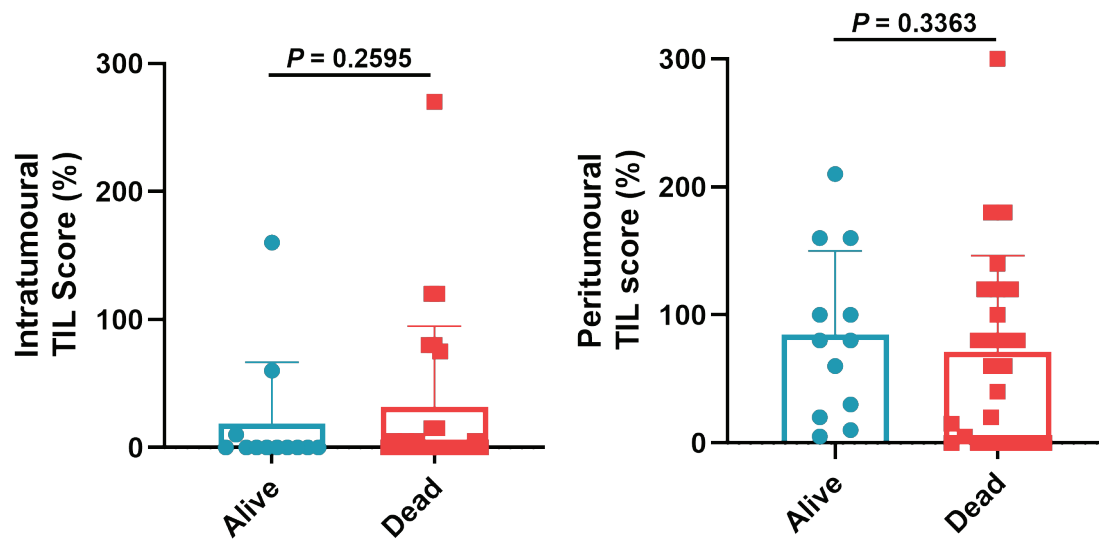

## DEG Cluster 1 + Int DT Cluster

- Genes associated with antigen presentation, immune response and IFN signalling
- Intermediate TILs and PD-L1 expression
- Intermediate expression of alternative drug targets (*ADA*, *CD276*, *PVR*)

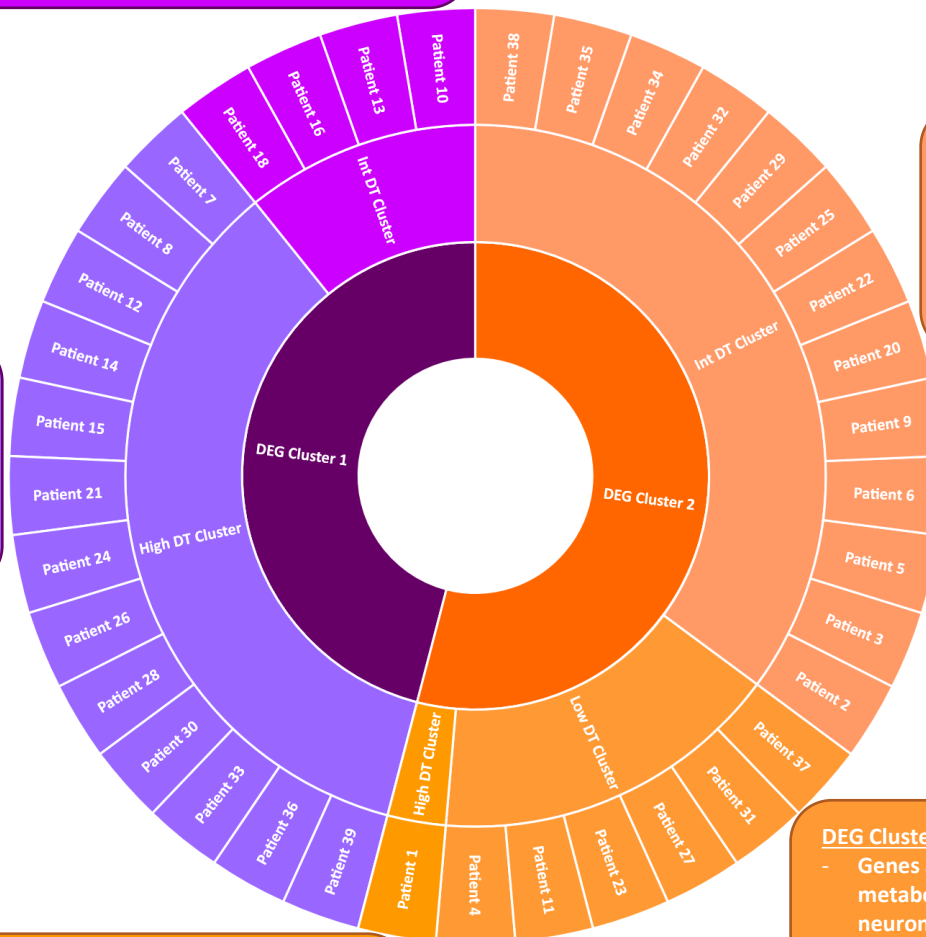

## DEG Cluster 2 + Int DT Cluster

- Genes associated with hypoxia, metabolism, signal transduction and neuronal signalling
- Intermediate TILs and PD-L1 expression
- Intermediate expression of alternative drug targets (*ADA*, *CD276*, *PVR*)

## DEG Cluster 1 + High DT Cluster

- Genes associated with antigen presentation, immune response and IFN signalling
- High TILs and PD-L1 expression
- High expression of alternative drug targets (*IDO1*, *BTLA*, *ICOS*, *TIGIT*)

## DEG Cluster 2 + Low DT Cluster

- Genes associated with hypoxia, metabolism, signal transduction and neuronal signalling
- Low TILs and PD-L1 expression
- Low expression of alternative drug targets

## DEG Cluster 2 + High DT Cluster

- Genes associated with hypoxia, metabolism, signal transduction and neuronal signalling
- Low TILs and PD-L1 expression
- High expression of alternative drug targets (*IDO1*, *BTLA*, *ICOS*, *TIGIT*)
