# Supplementary material for: Clinical and Molecular Heterogeneity in Patients with Innate Resistance to Anti-PD-1 +/− Anti-CTLA-4 Immunotherapy in Metastatic Melanoma Reveals Distinct Therapeutic Targets
Source: Cancers (Basel). 2021 Jun 25;13(13):3186. doi: 10.3390/cancers13133186 (PMC8267740; doi:10.3390/cancers13133186)
Supplement: Supplementary file 1 [file cancers-13-03186-s001.zip › Supplementary Table 1 and 2.xlsx]

## Sheet: Supplementary Table 1
Supplementary Table S1. Genes included in the custom QIAseq targeted RNA panel.
Gene ID	Gene Symbol	Gene Strand	Chromosome	Loc 5	Loc 3
ENSG00000186891	TNFRSF18	-1	chr1	1204448	1205459
ENSG00000186827	TNFRSF4	-1	chr1	1211346	1211445
ENSG00000215788	TNFRSF25	-1	chr1	6464433	6464621
ENSG00000041988	THAP3	1	chr1	6628529	6628647
ENSG00000049249	TNFRSF9	-1	chr1	7920816	7920909
ENSG00000179840	PIK3CD-AS1	-1	chr1	9653578	9653679
ENSG00000171608	PIK3CD	1	chr1	9727098	9727197
ENSG00000116663	FBXO6	1	chr1	11671363	11671999
ENSG00000179051	RCC2	-1	chr1	17408930	17409023
ENSG00000117215	PLA2G2D	-1	chr1	20113687	20113781
ENSG00000169442	CD52	1	chr1	26320181	26320273
ENSG00000000938	FGR	-1	chr1	27612463	27612557
ENSG00000116350	SRSF4	-1	chr1	29148988	29149080
ENSG00000134644	PUM1	-1	chr1	30945389	30945482
ENSG00000060688	SNRNP40	-1	chr1	31259888	31259978
ENSG00000182866	LCK	1	chr1	32285774	32285863
ENSG00000163873	GRIK3	-1	chr1	36890947	36891041
ENSG00000084072	PPIE	1	chr1	39743264	39743891
ENSG00000049089	COL9A2	-1	chr1	40300517	40300616
ENSG00000132780	NASP	1	chr1	45584103	45591231
ENSG00000154027	AK5	1	chr1	77558617	77558715
ENSG00000137959	IFI44L	1	chr1	78641025	78641119
ENSG00000117228	GBP1	-1	chr1	89052854	89052948
ENSG00000162654	GBP4	-1	chr1	89197127	89197221
ENSG00000154451	GBP5	-1	chr1	89267434	89267525
ENSG00000162676	GFI1	-1	chr1	92475399	92475497
ENSG00000177272	KCNA3	-1	chr1	110672679	110672773
ENSG00000134242	PTPN22	-1	chr1	113859363	113859456
ENSG00000116824	CD2	1	chr1	116754685	116754776
ENSG00000134258	VTCN1	-1	chr1	117145004	117145098
ENSG00000163131	CTSS	-1	chr1	150747788	150747877
ENSG00000143390	RFX5	-1	chr1	151344727	151344821
ENSG00000143552	NUP210L	-1	chr1	154054243	154054344
ENSG00000160710	ADAR	-1	chr1	154601377	154601471
ENSG00000254726	MEX3A	-1	chr1	156076271	156076365
ENSG00000187862	TTC24	1	chr1	156585739	156585958
ENSG00000160856	FCRL3	-1	chr1	157676541	157676635
ENSG00000132704	FCRL2	-1	chr1	157766861	157766961
ENSG00000163563	MNDA	1	chr1	158831416	158831511
ENSG00000163564	PYHIN1	1	chr1	158931673	158931769
ENSG00000163568	AIM2	-1	chr1	159073344	159073441
ENSG00000162706	CADM3	1	chr1	159193896	159193999
ENSG00000225670	CADM3-AS1	-1	chr1	159195048	159195142
ENSG00000181036	FCRL6	1	chr1	159809670	159810180
ENSG00000188004	C1orf204	-1	chr1	159837986	159840761
ENSG00000162739	SLAMF6	-1	chr1	160491268	160491362
ENSG00000066294	CD84	-1	chr1	160554042	160554136
ENSG00000117090	SLAMF1	-1	chr1	160637292	160637386
ENSG00000117091	CD48	-1	chr1	160685020	160685117
ENSG00000026751	SLAMF7	1	chr1	160753271	160753365
ENSG00000122224	LY9	1	chr1	160799843	160799941
ENSG00000122223	CD244	-1	chr1	160841755	160841858
ENSG00000198842	DUSP27	1	chr1	167126706	167126795
ENSG00000198821	CD247	-1	chr1	167431530	167431624
ENSG00000198771	RCSD1	1	chr1	167705136	167705231
ENSG00000188404	SELL	-1	chr1	169708591	169708685
ENSG00000007933	FMO3	1	chr1	171114125	171114219
ENSG00000117560	FASLG	1	chr1	172665679	172665772
ENSG00000117586	TNFSF4	-1	chr1	173186622	173186721
ENSG00000081237	PTPRC	1	chr1	198639110	198639299
ENSG00000122188	LAX1	1	chr1	203774048	203774142
ENSG00000266094	RASSF5	1	chr1	206586845	206586936
ENSG00000009790	TRAF3IP3	1	chr1	209772974	209775396
ENSG00000162757	C1orf74	-1	chr1	209782918	209783014
ENSG00000197520	FAM177B	1	chr1	222746575	222746670
ENSG00000187554	TLR5	-1	chr1	223110467	223110561
ENSG00000047056	WDR37	1	chr10	1072135	1072233
ENSG00000107959	PITRM1	-1	chr10	3137793	3137889
ENSG00000237399	PITRM1-AS1	1	chr10	3146021	3146113
ENSG00000134470	IL15RA	-1	chr10	5960467	5960556
ENSG00000065675	PRKCQ	-1	chr10	6456712	6456806
ENSG00000123243	ITIH5	-1	chr10	7585909	7586003
ENSG00000107562	CXCL12	-1	chr10	44378681	44380816
ENSG00000128815	WDFY4	1	chr10	48731110	48731208
ENSG00000165383	LRRC18	-1	chr10	48913473	48913571
ENSG00000228065	LINC01515	1	chr10	65585667	65585765
ENSG00000180644	PRF1	-1	chr10	70597670	70597759
ENSG00000107736	CDH23	1	chr10	71645837	71645936
ENSG00000107738	C10orf54	-1	chr10	71761896	71761998
ENSG00000107742	SPOCK2	-1	chr10	72088477	72088595
ENSG00000152766	ANKRD22	-1	chr10	88822897	88822991
ENSG00000119922	IFIT2	1	chr10	89307026	89307122
ENSG00000119917	IFIT3	1	chr10	89339565	89339658
ENSG00000152778	IFIT5	1	chr10	89417277	89417371
ENSG00000095596	CYP26A1	1	chr10	93077247	93077341
ENSG00000138185	ENTPD1	1	chr10	95864738	95864835
ENSG00000173088	C10orf131	1	chr10	95938113	95938205
ENSG00000197142	ACSL5	1	chr10	112427549	112427643
ENSG00000165813	CCDC186	-1	chr10	114162758	114162855
ENSG00000185101	ANO9	-1	chr11	418980	419667
ENSG00000177106	EPS8L2	1	chr11	723258	724731
ENSG00000132109	TRIM21	-1	chr11	4384971	4385066
ENSG00000132274	TRIM22	1	chr11	5710471	5710561
ENSG00000187398	LUZP2	1	chr11	25080012	25080106
ENSG00000214872	SMTNL1	1	chr11	57542913	57543007
ENSG00000156587	UBE2L6	-1	chr11	57552164	57552259
ENSG00000156738	MS4A1	1	chr11	60468359	60468456
ENSG00000013725	CD6	1	chr11	61011073	61013454
ENSG00000110448	CD5	1	chr11	61127392	61127486
ENSG00000133321	RARRES3	1	chr11	63544738	63544832
ENSG00000167771	RCOR2	-1	chr11	63911452	63911547
ENSG00000168062	BATF2	-1	chr11	64988990	64989087
ENSG00000172543	CTSW	1	chr11	65883631	65883723
ENSG00000213402	PTPRCAP	-1	chr11	67435514	67435608
ENSG00000137501	SYTL2	-1	chr11	85704911	85705005
ENSG00000023445	BIRC3	1	chr11	102324784	102324878
ENSG00000262406	MMP12	-1	chr11	102865785	102865880
ENSG00000137757	CASP5	-1	chr11	105000288	105000390
ENSG00000152578	GRIA4	1	chr11	105612289	105612383
ENSG00000160593	AMICA1	-1	chr11	118200487	118200580
ENSG00000198851	CD3E	1	chr11	118315829	118315923
ENSG00000160654	CD3G	1	chr11	118349845	118349939
ENSG00000184232	OAF	1	chr11	120225747	120226895
ENSG00000109943	CRTAM	1	chr11	122872337	122872433
ENSG00000110002	VWA5A	1	chr11	124117675	124117766
ENSG00000111224	PARP11	-1	chr12	3812208	3812301
ENSG00000118971	CCND2	1	chr12	4301485	4301579
ENSG00000139193	CD27	1	chr12	6451551	6451653
ENSG00000089692	LAG3	1	chr12	6774733	6774829
ENSG00000205846	CLEC6A	1	chr12	8455945	8456039
ENSG00000166523	CLEC4E	-1	chr12	8534598	8534694
ENSG00000126838	PZP	-1	chr12	9192626	9192715
ENSG00000110848	CD69	-1	chr12	9760794	9760884
ENSG00000134539	KLRD1	1	chr12	10314741	10314842
ENSG00000255819	KLRC4-KLRK1	-1	chr12	10372971	10373071
ENSG00000213809	KLRK1	-1	chr12	10373016	10373118
ENSG00000183542	KLRC4	-1	chr12	10409616	10409716
ENSG00000134545	KLRC1	-1	chr12	10450990	10451083
ENSG00000139055	ERP27	-1	chr12	14915499	14915598
ENSG00000118308	LRMP	1	chr12	25101188	25101288
ENSG00000110900	TSPAN11	1	chr12	30964003	30979565
ENSG00000173208	ABCD2	-1	chr12	39586159	39586253
ENSG00000188906	LRRK2	1	chr12	40257283	40257376
ENSG00000018236	CNTN1	1	chr12	40922278	40922374
ENSG00000139549	DHH	-1	chr12	49089546	49089648
ENSG00000178401	DNAJC22	1	chr12	49349170	49349274
ENSG00000110934	BIN2	-1	chr12	51281413	51281508
ENSG00000111057	KRT18	1	chr12	52952482	52952576
ENSG00000135426	TESPA1	-1	chr12	54963857	54963949
ENSG00000185633	NDUFA4L2	-1	chr12	57236614	57237054
ENSG00000123329	ARHGAP9	-1	chr12	57472344	57472444
ENSG00000240771	ARHGEF25	1	chr12	57617042	57617146
ENSG00000111537	IFNG	-1	chr12	68159578	68159672
ENSG00000090382	LYZ	1	chr12	69353189	69353283
ENSG00000139292	LGR5	1	chr12	71584482	71584576
ENSG00000196091	MYBPC1	1	chr12	101677290	101677384
ENSG00000111670	GNPTAB	-1	chr12	101796684	101830574
ENSG00000136048	DRAM1	1	chr12	101921343	101921445
ENSG00000111331	OAS3	1	chr12	112941606	112941696
ENSG00000111335	OAS2	1	chr12	112987096	112987195
ENSG00000135127	CCDC64	1	chr12	120072612	120072713
ENSG00000112787	FBRSL1	1	chr12	132583936	132584034
ENSG00000122025	FLT3	-1	chr13	28070511	28070607
ENSG00000133119	RFC3	1	chr13	33830727	33830821
ENSG00000133106	EPSTI1	-1	chr13	42900360	42917613
ENSG00000136167	LCP1	-1	chr13	46134149	46134243
ENSG00000184226	PCDH9	-1	chr13	67226223	67226317
ENSG00000169413	RNASE6	1	chr14	20781069	20781162
ENSG00000277734	TRAC	1	chr14	22547568	22547662
ENSG00000139880	CDH24	-1	chr14	23047686	23047781
ENSG00000092010	PSME1	1	chr14	24138788	24138880
ENSG00000100911	PSME2	-1	chr14	24146913	24147007
ENSG00000165379	LRFN5	1	chr14	41887799	41887893
ENSG00000131979	GCH1	-1	chr14	54842631	54842725
ENSG00000100578	KIAA0586	1	chr14	58465870	58465964
ENSG00000027075	PRKCH	1	chr14	61550876	61550970
ENSG00000179841	AKAP5	1	chr14	64469529	64469623
ENSG00000156127	BATF	1	chr14	75522665	75525111
ENSG00000100629	CEP128	-1	chr14	80836227	80836319
ENSG00000015133	CCDC88C	-1	chr14	91408662	91408756
ENSG00000100628	ASB2	-1	chr14	93934598	93934692
ENSG00000140105	WARS	-1	chr14	100334659	100334753
ENSG00000185559	DLK1	1	chr14	100728437	100729041
ENSG00000254656	RTL1	-1	chr14	100882335	100882428
ENSG00000183484	GPR132	-1	chr14	105051305	105051396
ENSG00000172575	RASGRP1	-1	chr15	38516203	38516298
ENSG00000137842	TMEM62	1	chr15	43154704	43154798
ENSG00000166946	CCNDBP1	1	chr15	43191453	43191546
ENSG00000229474	PATL2	-1	chr15	44665847	44665941
ENSG00000185880	TRIM69	1	chr15	44767340	44767437
ENSG00000137767	SQRDL	1	chr15	45676134	45676232
ENSG00000140284	SLC27A2	1	chr15	50226997	50227091
ENSG00000128918	ALDH1A2	-1	chr15	57961175	57961270
ENSG00000174498	IGDCC3	-1	chr15	65328552	65328646
ENSG00000103742	IGDCC4	-1	chr15	65382185	65382279
ENSG00000103855	CD276	1	chr15	73708431	73711169
ENSG00000137868	STRA6	-1	chr15	74193810	74195306
ENSG00000169410	PTPN9	-1	chr15	75468070	75468164
ENSG00000166426	CRABP1	1	chr15	78347947	78348046
ENSG00000140511	HAPLN3	-1	chr15	88877905	88878004
ENSG00000140563	MCTP2	1	chr15	94356185	94356288
ENSG00000090565	RAB11FIP3	1	chr16	522148	522239
ENSG00000130731	C16orf13	-1	chr16	634501	634621
ENSG00000127561	SYNGR3	1	chr16	1994119	1994215
ENSG00000008517	IL32	1	chr16	3068180	3069023
ENSG00000167984	NLRC3	-1	chr16	3542223	3542732
ENSG00000179583	CIITA	1	chr16	10898670	10898959
ENSG00000197471	SPN	1	chr16	29663849	29663952
ENSG00000102879	CORO1A	1	chr16	30187992	30188084
ENSG00000005844	ITGAL	1	chr16	30499346	30499447
ENSG00000156886	ITGAD	1	chr16	31426116	31426210
ENSG00000083799	CYLD	1	chr16	50749907	50750001
ENSG00000070915	SLC12A3	1	chr16	56902386	56902488
ENSG00000140853	NLRC5	1	chr16	57083223	57083323
ENSG00000159753	RLTPR	1	chr16	67654417	67654516
ENSG00000205220	PSMB10	-1	chr16	67936835	67936931
ENSG00000197943	PLCG2	1	chr16	81936170	81936268
ENSG00000140968	IRF8	1	chr16	85903084	85903175
ENSG00000083454	P2RX5	-1	chr17	3688639	3688733
ENSG00000177602	GSG2	1	chr17	3725416	3725510
ENSG00000083457	ITGAE	-1	chr17	3757034	3757130
ENSG00000108405	P2RX1	-1	chr17	3905338	3916159
ENSG00000132530	XAF1	1	chr17	6770730	6770826
ENSG00000072818	ACAP1	1	chr17	7351295	7351389
ENSG00000125430	HS3ST3B1	1	chr17	14348517	14348611
ENSG00000166750	SLFN5	1	chr17	35259163	35259257
ENSG00000154760	SLFN13	-1	chr17	35440033	35440127
ENSG00000205045	SLFN12L	-1	chr17	35479884	35479974
ENSG00000236320	SLFN14	-1	chr17	35557434	35557528
ENSG00000271503	CCL5	-1	chr17	35871498	35871596
ENSG00000275302	CCL4	1	chr17	36105487	36105580
ENSG00000276085	CCL3L3	-1	chr17	36195297	36195808
ENSG00000161405	IKZF3	-1	chr17	39766098	39766191
ENSG00000126353	CCR7	-1	chr17	40555609	40555702
ENSG00000108379	WNT3	-1	chr17	46762742	46762836
ENSG00000073861	TBX21	1	chr17	47745741	47745835
ENSG00000141293	SKAP1	-1	chr17	48180089	48180187
ENSG00000120068	HOXB8	-1	chr17	48613301	48613411
ENSG00000159217	IGF2BP1	1	chr17	49041396	49041492
ENSG00000108375	RNF43	-1	chr17	58362625	58363342
ENSG00000167861	HID1	-1	chr17	74958196	74958403
ENSG00000141576	RNF157	-1	chr17	76212382	76212474
ENSG00000167895	TMC8	1	chr17	78142080	78142172
ENSG00000173762	CD7	-1	chr17	82316689	82316781
ENSG00000141469	SLC14A1	1	chr18	45749814	45749903
ENSG00000152229	PSTPIP2	-1	chr18	45983767	45983861
ENSG00000150637	CD226	-1	chr18	69864337	69864435
ENSG00000205784	ARRDC5	-1	chr19	4896760	4896851
ENSG00000205744	DENND1C	-1	chr19	6477420	6478838
ENSG00000125726	CD70	-1	chr19	6586271	6586396
ENSG00000125735	TNFSF14	-1	chr19	6664882	6664975
ENSG00000142449	FBN3	-1	chr19	8065707	8065806
ENSG00000181143	MUC16	-1	chr19	8974274	8974368
ENSG00000132005	RFX1	-1	chr19	13961800	13961891
ENSG00000105122	RASAL3	-1	chr19	15454831	15456135
ENSG00000196684	HSH2D	1	chr19	16157905	16157996
ENSG00000130303	BST2	-1	chr19	17405482	17405576
ENSG00000096996	IL12RB1	-1	chr19	18082205	18083466
ENSG00000099337	KCNK6	1	chr19	38328203	38328305
ENSG00000104814	MAP4K1	-1	chr19	38614401	38616250
ENSG00000105329	TGFB1	-1	chr19	41330675	41330767
ENSG00000105369	CD79A	1	chr19	41879570	41880688
ENSG00000105409	ATP1A3	-1	chr19	41984990	41985085
ENSG00000073008	PVR	1	chr19	44653912	44654016
ENSG00000105499	PLA2G4C	-1	chr19	48053005	48053101
ENSG00000074219	TEAD2	-1	chr19	49341372	49342463
ENSG00000104951	IL4I1	-1	chr19	49890212	49890315
ENSG00000105374	NKG7	-1	chr19	51371688	51371796
ENSG00000105492	SIGLEC6	-1	chr19	51520017	51520111
ENSG00000239961	LILRA4	-1	chr19	54338443	54338544
ENSG00000104970	KIR3DX1	1	chr19	54543911	54544005
ENSG00000189013	KIR2DL4	1	chr19	54813956	54814053
ENSG00000189430	NCR1	1	chr19	54909443	54910031
ENSG00000167634	NLRP7	-1	chr19	54940297	54940397
ENSG00000083838	ZNF446	1	chr19	58480869	58480974
ENSG00000176887	SOX11	1	chr2	5700057	5700151
ENSG00000134326	CMPK2	-1	chr2	6861272	6861364
ENSG00000134324	LPIN1	1	chr2	11782229	11782323
ENSG00000115155	OTOF	-1	chr2	26457612	26457702
ENSG00000163171	CDC42EP3	-1	chr2	37646639	37646735
ENSG00000198369	SPRED2	-1	chr2	65334613	65334707
ENSG00000115297	TLX2	1	chr2	74516595	74516699
ENSG00000186854	TRABD2A	-1	chr2	84870422	84870511
ENSG00000153563	CD8A	-1	chr2	86785736	86785830
ENSG00000172116	CD8B	-1	chr2	86858219	86858320
ENSG00000158050	DUSP2	-1	chr2	96143204	96143300
ENSG00000115085	ZAP70	1	chr2	97737801	97738007
ENSG00000115604	IL18R1	1	chr2	102372003	102372097
ENSG00000115607	IL18RAP	1	chr2	102445214	102445308
ENSG00000153093	ACOXL	1	chr2	110798629	110798720
ENSG00000125637	PSD4	1	chr2	113201480	113201583
ENSG00000169967	MAP3K2	-1	chr2	127322095	127322186
ENSG00000121966	CXCR4	-1	chr2	136114563	136114657
ENSG00000075884	ARHGAP15	1	chr2	143155491	143155584
ENSG00000123609	NMI	-1	chr2	151270643	151270732
ENSG00000136541	ERMN	-1	chr2	157325540	157325638
ENSG00000115165	CYTIP	-1	chr2	157444015	157444114
ENSG00000248672	LY75-CD302	-1	chr2	159780026	159780120
ENSG00000054219	LY75	-1	chr2	159819805	159819899
ENSG00000115267	IFIH1	-1	chr2	162310821	162310915
ENSG00000178662	CSRNP3	1	chr2	165676396	165676491
ENSG00000172878	METAP1D	1	chr2	172061511	172061604
ENSG00000144355	DLX1	1	chr2	172089017	172089111
ENSG00000163492	CCDC141	-1	chr2	178905334	178905423
ENSG00000138434	SSFA2	1	chr2	181918784	181918880
ENSG00000115415	STAT1	-1	chr2	191009877	191009979
ENSG00000138378	STAT4	-1	chr2	191146665	191146755
ENSG00000173559	NABP1	1	chr2	191685626	191685725
ENSG00000163599	CTLA4	1	chr2	203867792	203867882
ENSG00000163600	ICOS	1	chr2	203955762	203955856
ENSG00000115457	IGFBP2	1	chr2	216661993	216664062
ENSG00000127824	TUBA4A	-1	chr2	219250295	219250395
ENSG00000135905	DOCK10	-1	chr2	224874026	224874120
ENSG00000135899	SP110	-1	chr2	230177568	230177662
ENSG00000079263	SP140	1	chr2	230225808	230225902
ENSG00000067066	SP100	1	chr2	230461278	230461372
ENSG00000188389	PDCD1	-1	chr2	241851156	241851274
ENSG00000089012	SIRPG	-1	chr20	1649123	1649224
ENSG00000101265	RASSF2	-1	chr20	4783678	4783772
ENSG00000125870	SNRPB2	1	chr20	16741152	16741246
ENSG00000077984	CST7	1	chr20	24957329	24957433
ENSG00000101082	SLA2	-1	chr20	36613341	36613439
ENSG00000101445	PPP1R16B	1	chr20	38922758	38922852
ENSG00000196839	ADA	-1	chr20	44621053	44621146
ENSG00000101017	CD40	1	chr20	46129254	46129345
ENSG00000132819	RBM38	1	chr20	57408564	57408665
ENSG00000235590	GNAS-AS1	-1	chr20	58850560	58850661
ENSG00000101203	COL20A1	1	chr20	63319489	63319590
ENSG00000155307	SAMSN1	-1	chr21	14485937	14486027
ENSG00000157601	MX1	1	chr21	41437038	41437127
ENSG00000160183	TMPRSS3	-1	chr21	42388987	42389968
ENSG00000160185	UBASH3A	1	chr21	42442488	42442591
ENSG00000093072	CECR1	-1	chr22	17191682	17191776
ENSG00000100023	PPIL2	1	chr22	21684767	21684860
ENSG00000254709	IGLL5	1	chr22	22895450	22895559
ENSG00000128271	ADORA2A	1	chr22	24441518	24441622
ENSG00000221963	APOL6	1	chr22	35667755	35667847
ENSG00000100320	RBFOX2	-1	chr22	35768256	35768348
ENSG00000128284	APOL3	-1	chr22	36141937	36142031
ENSG00000100336	APOL4	-1	chr22	36204629	36204721
ENSG00000128335	APOL2	-1	chr22	36228121	36228215
ENSG00000100342	APOL1	1	chr22	36265892	36265993
ENSG00000128311	TST	-1	chr22	37010866	37010969
ENSG00000100385	IL2RB	-1	chr22	37126240	37126340
ENSG00000128340	RAC2	-1	chr22	37226791	37231313
ENSG00000100298	APOBEC3H	1	chr22	39101243	39101334
ENSG00000056487	PHF21B	-1	chr22	44882081	44882175
ENSG00000134115	CNTN6	1	chr3	1385628	1385722
ENSG00000150995	ITPR1	1	chr3	4818083	4818176
ENSG00000169814	BTD	1	chr3	15644519	15644613
ENSG00000114166	KAT2B	1	chr3	20101331	20101425
ENSG00000163508	EOMES	-1	chr3	27719371	27719465
ENSG00000170293	CMTM8	1	chr3	32369904	32369995
ENSG00000168334	XIRP1	-1	chr3	39184415	39184507
ENSG00000121807	CCR2	1	chr3	46357791	46357886
ENSG00000160791	CCR5	1	chr3	46373804	46373893
ENSG00000239732	TLR9	-1	chr3	52223280	52223372
ENSG00000144730	IL17RD	-1	chr3	57096209	57096303
ENSG00000151276	MAGI1	-1	chr3	65430002	65430096
ENSG00000114455	HHLA2	1	chr3	108355127	108355221
ENSG00000163519	TRAT1	1	chr3	108853687	108853783
ENSG00000153283	CD96	1	chr3	111545287	111545389
ENSG00000186265	BTLA	-1	chr3	112466239	112466331
ENSG00000072858	SIDT1	1	chr3	113567548	113567647
ENSG00000181847	TIGIT	1	chr3	114308170	114308273
ENSG00000173193	PARP14	1	chr3	122718805	122718899
ENSG00000170819	BFSP2	1	chr3	133448517	133448609
ENSG00000114127	XRN1	-1	chr3	142425437	142425537
ENSG00000174946	GPR171	-1	chr3	151198694	151198788
ENSG00000181631	P2RY13	-1	chr3	151328135	151328231
ENSG00000114771	AADAC	1	chr3	151817470	151817564
ENSG00000078081	LAMP3	-1	chr3	183124109	183124204
ENSG00000172578	KLHL6	-1	chr3	183489417	183489511
ENSG00000178732	GP5	-1	chr3	194397771	194397866
ENSG00000178222	RNF212	-1	chr4	1096795	1108392
ENSG00000181215	C4orf50	-1	chr4	5957732	5957826
ENSG00000152969	JAKMIP1	-1	chr4	6084940	6085488
ENSG00000004468	CD38	1	chr4	15816513	15816613
ENSG00000002549	LAP3	1	chr4	17607603	17607696
ENSG00000197057	DTHD1	1	chr4	36316365	36316459
ENSG00000250254	PTTG2	1	chr4	37960509	37960610
ENSG00000174123	TLR10	-1	chr4	38773501	38773594
ENSG00000124406	ATP8A1	-1	chr4	42626995	42627098
ENSG00000151834	GABRA2	-1	chr4	46386092	46386182
ENSG00000074966	TXK	-1	chr4	48079916	48080018
ENSG00000109193	SULT1E1	-1	chr4	69857550	69857648
ENSG00000181617	FDCSP	1	chr4	70234112	70234208
ENSG00000138744	NAAA	-1	chr4	75940043	75940140
ENSG00000138755	CXCL9	-1	chr4	76003518	76003608
ENSG00000169245	CXCL10	-1	chr4	76021720	76021814
ENSG00000169248	CXCL11	-1	chr4	76034072	76034166
ENSG00000156234	CXCL13	1	chr4	77611008	77611110
ENSG00000145287	PLAC8	-1	chr4	83104897	83104986
ENSG00000152591	DSPP	1	chr4	87614083	87614176
ENSG00000138642	HERC6	1	chr4	88442354	88442448
ENSG00000138646	HERC5	1	chr4	88505682	88505773
ENSG00000070190	DAPP1	1	chr4	99868508	99868598
ENSG00000153064	BANK1	1	chr4	101855047	101855143
ENSG00000164100	NDST3	1	chr4	118054141	118054235
ENSG00000050730	TNIP3	-1	chr4	121132375	121132468
ENSG00000197410	DCHS2	-1	chr4	154334927	154335022
ENSG00000120251	GRIA2	1	chr4	157336453	157336546
ENSG00000164124	TMEM144	1	chr4	158212640	158212734
ENSG00000109511	ANXA10	1	chr4	168187423	168187518
ENSG00000137628	DDX60	-1	chr4	168280409	168280504
ENSG00000164342	TLR3	1	chr4	186083211	186083305
ENSG00000082196	C1QTNF3	-1	chr5	34043041	34043139
ENSG00000168685	IL7R	1	chr5	35867316	35867412
ENSG00000113088	GZMK	1	chr5	55031469	55031569
ENSG00000145649	GZMA	1	chr5	55108255	55108351
ENSG00000175857	GAPT	1	chr5	58494299	58494392
ENSG00000164197	RNF180	1	chr5	64214174	64214268
ENSG00000164176	EDIL3	-1	chr5	83963214	83963307
ENSG00000112893	MAN2A1	1	chr5	109781468	109781562
ENSG00000152503	TRIM36	-1	chr5	115133920	115134014
ENSG00000158985	CDC42SE2	1	chr5	131359417	131359517
ENSG00000197536	C5orf56	1	chr5	132419877	132449675
ENSG00000125347	IRF1	-1	chr5	132481829	132481923
ENSG00000184584	TMEM173	-1	chr5	139478279	139478377
ENSG00000182578	CSF1R	-1	chr5	150053689	150053783
ENSG00000198624	CCDC69	-1	chr5	151181942	151182035
ENSG00000113249	HAVCR1	-1	chr5	157055332	157055434
ENSG00000135077	HAVCR2	-1	chr5	157095307	157095396
ENSG00000113263	ITK	1	chr5	157240099	157240193
ENSG00000172568	FNDC9	-1	chr5	157345582	157345678
ENSG00000113645	WWC1	1	chr5	168454036	168455380
ENSG00000134516	DOCK2	1	chr5	169761521	169761617
ENSG00000204767	FAM196B	-1	chr5	169883058	169883152
ENSG00000113742	CPEB4	1	chr5	173953107	173953206
ENSG00000145990	GFOD1	-1	chr6	13363881	13363975
ENSG00000137393	RNF144B	1	chr6	18464990	18465084
ENSG00000111913	FAM65B	-1	chr6	24850600	24850694
ENSG00000186470	BTN3A2	1	chr6	26370404	26370508
ENSG00000026950	BTN3A1	1	chr6	26409678	26410031
ENSG00000111801	BTN3A3	1	chr6	26440510	26440612
ENSG00000112763	BTN2A1	1	chr6	26465261	26465362
ENSG00000168131	OR2B2	-1	chr6	27911249	27911343
ENSG00000124657	OR2B6	1	chr6	27957843	27957933
ENSG00000213886	UBD	-1	chr6	29559816	29559915
ENSG00000204642	HLA-F	1	chr6	29724256	29724371
ENSG00000214922	HLA-F-AS1	-1	chr6	29736187	29736278
ENSG00000206503	HLA-A	1	chr6	29945735	29945825
ENSG00000204592	HLA-E	1	chr6	30493363	30493457
ENSG00000234745	HLA-B	-1	chr6	31353876	31353972
ENSG00000204520	MICA	1	chr6	31415210	31415300
ENSG00000204516	MICB	1	chr6	31510434	31510528
ENSG00000232810	TNF	1	chr6	31577964	31578058
ENSG00000204267	TAP2	-1	chr6	32829929	32830018
ENSG00000204264	PSMB8	-1	chr6	32842146	32842247
ENSG00000204261	PSMB8-AS1	1	chr6	32844157	32844266
ENSG00000168394	TAP1	-1	chr6	32849010	32849101
ENSG00000240065	PSMB9	1	chr6	32859445	32859539
ENSG00000231925	TAPBP	-1	chr6	33304348	33304444
ENSG00000236104	ZBTB22	-1	chr6	33314794	33314894
ENSG00000010030	ETV7	-1	chr6	36366945	36368988
ENSG00000171611	PTCRA	1	chr6	42923108	42923199
ENSG00000112796	ENPP5	-1	chr6	46165434	46165528
ENSG00000146147	MLIP	1	chr6	54202122	54202216
ENSG00000119900	OGFRL1	1	chr6	71301974	71302065
ENSG00000135318	NT5E	1	chr6	85487335	85487429
ENSG00000155085	AK9	-1	chr6	109656764	109656858
ENSG00000188820	FAM26F	1	chr6	116463411	116463512
ENSG00000196911	KPNA5	1	chr6	116729633	116729727
ENSG00000172673	THEMIS	-1	chr6	127829582	127829673
ENSG00000164483	SAMD3	-1	chr6	130184473	130184574
ENSG00000112303	VNN2	-1	chr6	132744353	132744449
ENSG00000171408	PDE7B	1	chr6	136193948	136194042
ENSG00000027697	IFNGR1	-1	chr6	137204363	137204460
ENSG00000118503	TNFAIP3	1	chr6	137871249	137871344
ENSG00000010818	HIVEP2	-1	chr6	142771081	142771175
ENSG00000177688	SUMO4	1	chr6	149401070	149401162
ENSG00000120253	NUP43	-1	chr6	149726914	149727006
ENSG00000120278	PLEKHG1	1	chr6	150840571	150840665
ENSG00000112038	OPRM1	1	chr6	154091212	154091304
ENSG00000074706	IPCEF1	-1	chr6	154167926	154168020
ENSG00000164691	TAGAP	-1	chr6	159043983	159044160
ENSG00000198286	CARD11	-1	chr7	2939823	2939918
ENSG00000122691	TWIST1	-1	chr7	19116016	19116110
ENSG00000153790	C7orf31	-1	chr7	25136027	25136121
ENSG00000255690	TRIL	-1	chr7	28953680	28953773
ENSG00000136250	AOAH	-1	chr7	36540331	36540425
ENSG00000086288	NME8	1	chr7	37876889	37876988
ENSG00000227191	TRGC2	-1	chr7	38240079	38242441
ENSG00000185811	IKZF1	1	chr7	50400445	50400547
ENSG00000085563	ABCB1	-1	chr7	87531372	87531466
ENSG00000177409	SAMD9L	-1	chr7	93131629	93131723
ENSG00000106327	TFR2	-1	chr7	100620786	100620880
ENSG00000189056	RELN	-1	chr7	103519381	103519475
ENSG00000105851	PIK3CG	1	chr7	106872841	106872935
ENSG00000091128	LAMB4	-1	chr7	108111840	108111934
ENSG00000081803	CADPS2	-1	chr7	122554588	122554682
ENSG00000128596	CCDC136	1	chr7	128801320	128801421
ENSG00000158457	TSPAN33	1	chr7	129168671	129168771
ENSG00000211772	TRBC2	1	chr7	142802130	142802524
ENSG00000159784	FAM131B	-1	chr7	143354745	143354841
ENSG00000179144	GIMAP7	1	chr7	150520003	150520093
ENSG00000133574	GIMAP4	1	chr7	150572829	150572931
ENSG00000196329	GIMAP5	1	chr7	150743639	150743733
ENSG00000104689	TNFRSF10A	-1	chr8	23191649	23191746
ENSG00000042980	ADAM28	1	chr8	24329985	24330079
ENSG00000120899	PTK2B	1	chr8	27439091	27439365
ENSG00000189233	NUGGC	-1	chr8	28022500	28022591
ENSG00000131203	IDO1	1	chr8	39928112	39928204
ENSG00000104237	RP1	1	chr8	54626594	54626688
ENSG00000254087	LYN	1	chr8	55999448	55999539
ENSG00000198846	TOX	-1	chr8	58838112	58838206
ENSG00000154188	ANGPT1	-1	chr8	107284710	107284804
ENSG00000164796	CSMD3	-1	chr8	112587100	112587194
ENSG00000177570	SAMD12	-1	chr8	118621828	118621924
ENSG00000165071	TMEM71	-1	chr8	132710254	132710350
ENSG00000107099	DOCK8	1	chr9	399154	399255
ENSG00000096968	JAK2	1	chr9	5077460	5077554
ENSG00000120217	CD274	1	chr9	5470301	5470395
ENSG00000107201	DDX58	-1	chr9	32488770	32488865
ENSG00000137078	SIT1	-1	chr9	35649365	35649465
ENSG00000107159	CA9	1	chr9	35681031	35681122
ENSG00000107242	PIP5K1B	1	chr9	68894498	68894592
ENSG00000106772	PRUNE2	-1	chr9	76652573	76652668
ENSG00000196730	DAPK1	1	chr9	87707256	87707349
ENSG00000187764	SEMA4D	-1	chr9	89405592	89405686
ENSG00000165152	TMEM246	-1	chr9	101476243	101476337
ENSG00000106948	AKNA	-1	chr9	114336186	114336277
ENSG00000148308	GTF3C5	1	chr9	133053847	133053940
ENSG00000225756	DBH-AS1	-1	chr9	133654594	133654695
ENSG00000123454	DBH	1	chr9	133658878	133658979
ENSG00000160360	GPSM1	1	chr9	136356528	136358115
ENSG00000148399	DPH7	-1	chr9	137555440	137555536
ENSG00000101916	TLR8	1	chrX	12920592	12920686
ENSG00000147041	SYTL5	1	chrX	38076593	38076687
ENSG00000156298	TSPAN7	1	chrX	38666171	38666260
ENSG00000102096	PIM2	-1	chrX	48915019	48915118
ENSG00000079482	OPHN1	-1	chrX	68064079	68064173
ENSG00000130055	GDPD2	1	chrX	70429562	70429660
ENSG00000147168	IL2RG	-1	chrX	71107856	71108314
ENSG00000186810	CXCR3	-1	chrX	71617316	71617406
ENSG00000186462	NAP1L2	-1	chrX	73214009	73214103
ENSG00000078589	P2RY10	1	chrX	78961446	78961538
ENSG00000147138	GPR174	1	chrX	79171039	79171133
ENSG00000102290	PCDH11X	1	chrX	91877433	91877562
ENSG00000147234	FRMPD3	1	chrX	107526596	107526690
ENSG00000183918	SH2D1A	1	chrX	124346361	124346454
ENSG00000102245	CD40LG	1	chrX	136659333	136659426
ENSG00000171100	MTM1	1	chrX	150645746	150645841

## Sheet: Supplementary Table 2
Supplementary Table S2. Clinical summary of patients treated with anti-PD-1-based therapies.
Patient No.	Age (Years)	Sex	Treatment	Site of Biopsy	Progression-free Survival (months)	Last Followup Status	ENA Filename
1	95.6329	Male	Pembrolizumab	Subcutaneous	0.592105	alive	PD1_P1
2	85.9507	Male	Pembrolizumab	Subcutaneous	0.855263	dead	PD1_P2
3	79.7479	Male	Pembrolizumab	Subcutaneous	1.25	alive	PD1_P3
4	77.4548	Male	Pembrolizumab	Primary	2.36842	dead	PD1_P4
5	72.7671	Female	Ipilimumab + Nivolumab	Other (Brain)	1.67763	dead	IPIPD1_P5
6	72.5699	Male	Ipilimumab + Pembrolizumab	Subcutaneous	0.592105	dead	IPIPD1_P6
7	49.3233	Female	Ipilimumab + Pembrolizumab	Lymph node	1.31579	dead	IPIPD1_P7
8	36.5205	Female	Ipilimumab + Nivolumab	Lymph node	1.44737	alive	IPIPD1_P8
9	41.7863	Male	Ipilimumab + Nivolumab	Other (Brain)	1.94079	alive	IPIPD1_P9
10	68.7973	Male	Pembrolizumab	Other (Brain)	1.41447	dead	PD1_P10
11	68	Male	Pembrolizumab	Lymph node	0.164474	dead	PD1_P11
12	33.663	Male	Ipilimumab + Nivolumab	Lymph node	1.61184	dead	IPIPD1_P12
13	66.5973	Male	Pembrolizumab	Other (Lung)	2.00658	dead	PD1_P13
14	52.9808	Female	Nivolumab	Lymph node	2.66447	dead	PD1_P14
15	75.6219	Male	Nivolumab	Lymph node	1.94079	dead	PD1_P15
16	55.611	Male	Ipilimumab + Pembrolizumab	Lymph node	2.66447	dead	IPIPD1_P16
17	54.9534	Male	Nivolumab	N/A	1.15132	dead
18	57.9014	Male	Ipilimumab + Pembrolizumab	Lymph node	0.559211	dead	IPIPD1_P18
19	90.9068	Female	Pembrolizumab	N/A	2.99342	alive
20	69.011	Female	Ipilimumab + Nivolumab	Lymph node	1.74342	dead	IPIPD1_P20
21	84.9616	Male	Pembrolizumab	Subcutaneous	2.96053	alive	PD1_P21
22	80.4548	Male	Nivolumab	Subcutaneous	1.71053	alive	PD1_P22
23	71.3123	Male	Pembrolizumab	Other (Brain)	4.07895	dead	PD1_P23
24	61.8877	Male	Ipilimumab + Nivolumab	Lymph node	2.69737	dead	IPIPD1_P24
25	85.6027	Female	Nivolumab	Subcutaneous	2.76316	alive	PD1_P25
26	65.4	Male	Pembrolizumab	Lymph node	2.5	dead	PD1_P26
27	65.4493	Female	Pembrolizumab	Subcutaneous	2.73026	dead	PD1_P27
28	77.4575	Female	Pembrolizumab	Lymph node	2.5	dead	PD1_P28
29	88.8164	Male	Pembrolizumab	Subcutaneous	0.723684	dead	PD1_P29
30	86.6493	Male	Pembrolizumab	Subcutaneous	2.07237	alive	PD1_P30
31	51.2795	Female	Pembrolizumab	Subcutaneous	3.22368	dead	PD1_P31
32	62.7096	Male	Pembrolizumab	Subcutaneous	2.76316	dead	PD1_P32
33	48.1151	Male	Ipilimumab + Nivolumab	Subcutaneous	1.31579	dead	IPIPD1_P33
34	41.589	Male	Nivolumab	Subcutaneous	0.855263	alive	PD1_P34
35	54.2	Female	Pembrolizumab	Subcutaneous	2.56579	dead	PD1_P35
36	49.2274	Female	Ipilimumab + Pembrolizumab	Subcutaneous	6.80921	dead	IPIPD1_P36
37	68.5644	Female	Ipilimumab + Nivolumab	Lymph node	0.328947	alive	IPIPD1_P37
38	57.9205	Female	Ipilimumab + Nivolumab	Other (Lung)	1.31579	alive	IPIPD1_P38
39	76.0082	Male	Nivolumab	Lymph node	1.38158	alive	PD1_P39
40	56.611	Male	Pembrolizumab	N/A	2.46711	alive
